# Supplementary material
Source: HighWire-hosted journal article supplement (https://cmaj.ca/highwire/filestream/72930/field_highwire_adjunct_files/2/181426-res-3-at.pdf)
Supplement: 181426-res-3-at.pdf [file 181426-res-3-at.pdf]

| Appendix 3 (as supplied by the authors): Pediatric Emergency Department visit characteristics by study sites and years                                                |                   |                   |                   |                   |                   |                  |                  |                  |                  |                  |                   |                   |                  |                  |                  |                   |                   |                   |                   |                  |
|-----------------------------------------------------------------------------------------------------------------------------------------------------------------------|-------------------|-------------------|-------------------|-------------------|-------------------|------------------|------------------|------------------|------------------|------------------|-------------------|-------------------|------------------|------------------|------------------|-------------------|-------------------|-------------------|-------------------|------------------|
|                                                                                                                                                                       | Ontario           |                   |                   |                   |                   | Manitoba         |                  |                  |                  |                  | Alberta           |                   |                  |                  |                  | British Columbia  |                   |                   |                   |                  |
| Study years                                                                                                                                                           | 2010              | 2011              | 2012              | 2013              | 2014              | 2010             | 2011             | 2012             | 2013             | 2014             | 2010              | 2011              | 2012             | 2013             | 2014             | 2010              | 2011              | 2012              | 2013              | 2014             |
| <b>Total PED volume</b>                                                                                                                                               | 156,925           | 178,311           | 186,644           | 188,611           | 200,563           | 48,834           | 49,218           | 53,000           | 48,838           | 52,633           | 89,977            | 97,976            | 114,302          | 122,374          | 129,841          | 40,028            | 43,918            | 42,511            | 43,102            | 43,859           |
| <b>CTAS 1</b>                                                                                                                                                         | 1.0%              | 0.9%              | 0.9%              | 0.8%              | 0.8%              | 0.4%             | 0.3%             | 0.4%             | 0.3%             | 0.2%             | 0.4%              | 0.4%              | 0.4%             | 0.6%             | 0.6%             | 0.6%              | 0.5%              | 0.5%              | 0.5%              | 0.5%             |
| <b>CTAS 2</b>                                                                                                                                                         | 17.1%             | 16.4%             | 15.5%             | 15.0%             | 15.2%             | 9.4%             | 9.4%             | 9.6%             | 9.2%             | 9.2%             | 14.0%             | 13.0%             | 12.3%            | 14.6%            | 16.8%            | 11.5%             | 11.4%             | 12.5%             | 14.3%             | 15.9%            |
| <b>CTAS 3</b>                                                                                                                                                         | 45.4%             | 44.1%             | 44.8%             | 44.7%             | 43.6%             | 33.9%            | 32.8%            | 32.8%            | 33.6%            | 33.4%            | 47.4%             | 47.6%             | 48.1%            | 47.0%            | 47.8%            | 33.7%             | 34.2%             | 35.6%             | 37.5%             | 38.3%            |
| <b>CTAS 4</b>                                                                                                                                                         | 34.7%             | 36.0%             | 35.7%             | 36.0%             | 36.2%             | 50.3%            | 50.4%            | 51.7%            | 52.5%            | 53.4%            | 35.5%             | 36.0%             | 35.8%            | 32.2%            | 31.5%            | 48.4%             | 49.7%             | 48.3%             | 44.7%             | 43.2%            |
| <b>CTAS 5</b>                                                                                                                                                         | 1.5%              | 2.4%              | 3.1%              | 3.3%              | 3.9%              | 6.1%             | 7.0%             | 5.5%             | 4.4%             | 3.8%             | 2.6%              | 3.0%              | 3.4%             | 5.6%             | 3.2%             | 5.9%              | 4.2%              | 3.2%              | 3.0%              | 2.1%             |
| <b>LWBS %</b>                                                                                                                                                         | 2.9%              | 3.0%              | 3.0%              | 3.0%              | 3.1%              | 2.4%             | 1.9%             | 3.1%             | 2.1%             | 3.3%             | 4.6%              | 3.4%              | 2.7%             | 2.4%             | 3.0%             | 2.8%              | 4.9%              | 4.7%              | 3.5%              | 2.5%             |
| <b>Admitted at index</b>                                                                                                                                              | 9.1%              | 9.1%              | 9.2%              | 9.2%              | 9.1%              | 8.1%             | 7.8%             | 7.9%             | 7.9%             | 7.6%             | 9.7%              | 9.0%              | 8.2%             | 8.0%             | 8.2%             | 8.6%              | 8.6%              | 8.5%              | 8.3%              | 7.7%             |
| <b>Overall ED LOS median in min. (IQR)</b>                                                                                                                            | 180<br>(108, 294) | 180<br>(108, 282) | 168<br>(102, 264) | 174<br>(108, 264) | 174<br>(108, 270) | 123<br>(74, 203) | 117<br>(69, 193) | 136<br>(82, 219) | 139<br>(85, 224) | 150<br>(92, 238) | 178<br>(111, 272) | 167<br>(106, 255) | 148<br>(93, 237) | 145<br>(90, 233) | 152<br>(95, 243) | 168<br>(111, 260) | 191<br>(125, 285) | 195<br>(124, 295) | 167<br>(104, 258) | 144<br>(90, 225) |
| Note: CTAS = Canadian Triage and Acuity Scale, IQR = interquartile range, LOS = length of stay, LWBS = left without being seen, PED = pediatric emergency department. |                   |                   |                   |                   |                   |                  |                  |                  |                  |                  |                   |                   |                  |                  |                  |                   |                   |                   |                   |                  |

Appendix to: Doan Q, Wong H, Meckler G, et al.; for Pediatric Emergency Research Canada (PERC). The impact of pediatric emergency department crowding on patient and health care system outcomes: a multicentre cohort study. *CMAJ* 2019. doi: 10.1503/cmaj.181426. Copyright © 2019 The Author(s) or their employer(s).

To receive this resource in an accessible format, please contact us at [cmajgroup@cmaj.ca](mailto:cmajgroup@cmaj.ca).
